# Supplementary material
Source: publisher figshare collection journal article supplement (https://diabetesjournals.figshare.com/articles/dataset/_/26359831)

**Sensor-detected hypoglycemia <70mg/dl**

**Symptomatic hypoglycemia**

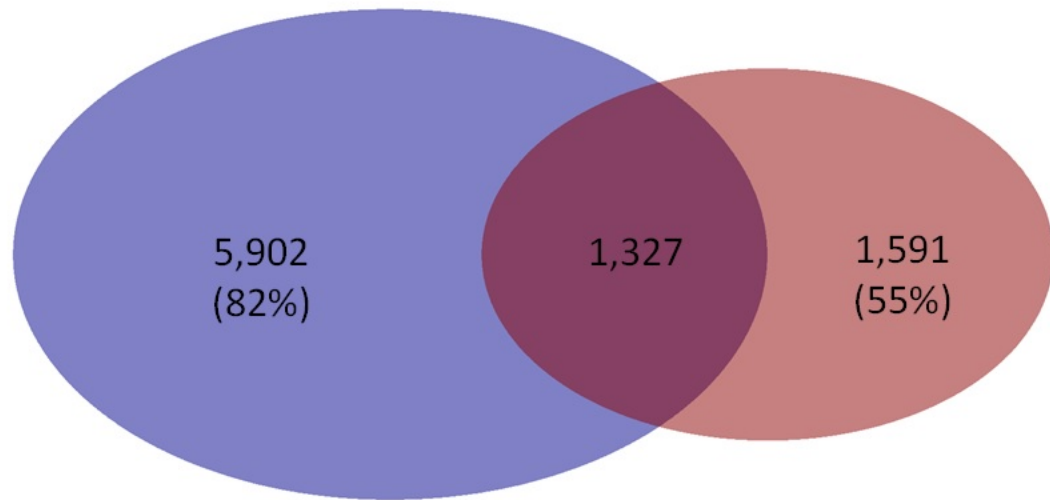

Supplement: Supplementary file 1 [file 1]

**Sensor-detected hypoglycemia <70mg/dl**

**Symptomatic hypoglycemia**

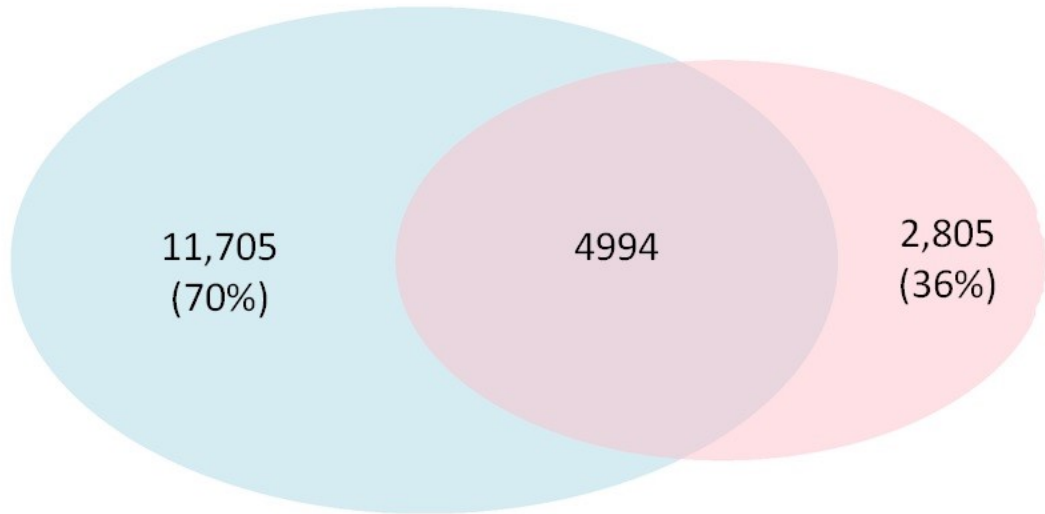

Supplement: Supplementary file 2 [file 1]

**Sensor-detected hypoglycemia <70mg/dl**

**Symptomatic hypoglycemia**

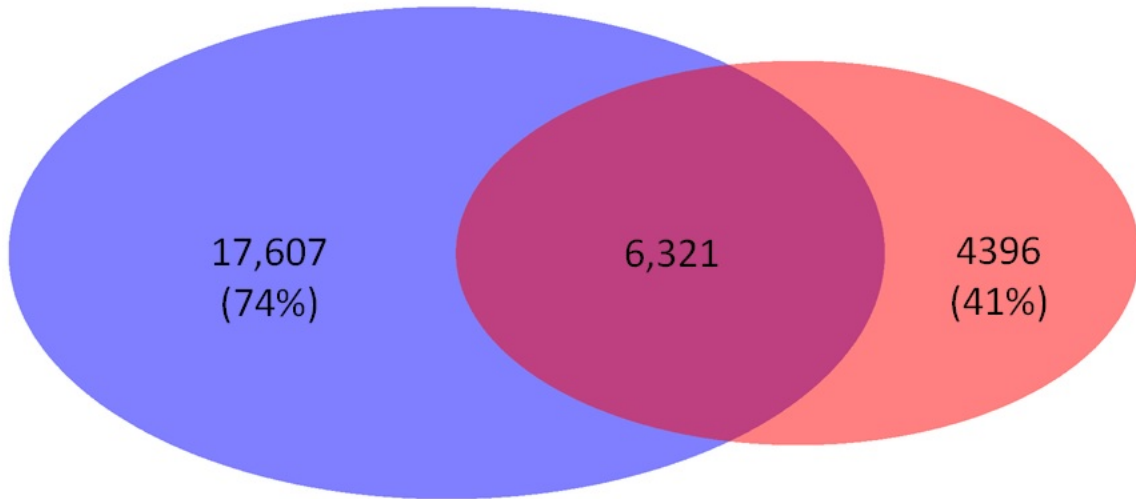

Supplement: Supplementary file 3 [file 1]
